# Supplementary material
Source: HighWire-hosted journal article supplement (https://bmjopen.bmj.com/content/12/5/e061801)
Supplement: inline-supplementary-material-2 [file inline-supplementary-material-2.pdf]

## Appendix

### Sensitivity analysis

To detect the studies which influence the overall estimate of our meta-analysis, we performed sensitivity analysis. The results of the sensitivity analysis, which was done by excluding studies one by one, revealed no significant change in the pooled estimate(OR) when excluding any individual study (Table 3).

Table 3: sensitivity analysis

| <b>Study omitted</b>       | <b>Estimate(OR)</b> | <b>95% CI</b> |
|----------------------------|---------------------|---------------|
| Mohammedamin. et al.(2020) | 2.16                | 1.23-3.79     |
| Bereket.et al. (2020)      | 2.12                | 1.17- 3.81    |
| Nigus.et al. (2020)        | 1.96                | 1.16-3.32     |
| Tesfa.et al. (2016)        | 2.04                | 1.16-3.58     |
| Teshager.et al. (2016)     | 1.85                | 1.19-2.87     |
| zelalem et al (2016)       | 2.54                | 1.72-3.75     |
| Mogesie et al. (2020)      | 2.34                | 1.41-3.89     |
| Combined                   | 2.14                | 1.34-3.42     |
